# Supplementary material
Source: publisher figshare collection journal article supplement (https://karger.figshare.com/ndownloader/files/23100569)
Supplement: Supplementary file 1 [file 23100569]

**Supplement. Table:** IndividualIGF-I- and BMI-SDS Values of Patients with Tonsillectomy and/or Adenoidectomy

Compared to Median Values of the Age-matched Control Group without Tonsillectomy

and/or Adenoidectomy

| **Patient no.** | **Age, y**  **at T&A** | **IGF-I-SDS**  **0-6 mo. pre-T&A** |  | **Median IGF-I-SDS of patients without T&A** | **BMI-SDS**  **0-6 mo. pre- T&A** |  | **Median BMI-SDS of patients without T&A** |
| --- | --- | --- | --- | --- | --- | --- | --- |
| 1 | 1.3 | +0.16 | + | -2.34 | +0.19 | + | -1.81 |
| 2 | 1.4 | -0.51 | + | -2.23 | +0.42 | + | -1.22 |
| 3 | 1.7 | -0.66 | + | -2.25 | +0.67 | + | -0.05 |
| 4 | 1.8 | -2.00 | + | -2.23 | -1.21 | - | -0.66 |
| 5 | 2.0 | -0.84 | + | -2.23 | -2.74 | - | -1.09 |
| 6 | 2.2 | -1.12 | - | -0.79 | -0.48 | + | -1.24 |
| 7 | 2.7 | -0.55 | + | -1.23 | -0.96 | + | -1.79 |
| 8 | 3.0 | +0.96 | + | -0.07 | -0.02 | + | -1.00 |
| 9 | 3.0 | +1.10 | + | -0.07 | -2.38 | - | -1.00 |
| 10 | 3.4 | -0.62 | - | -0.43 | +1.51 | + | -0.76 |
| 11 | 3.4 | +0.39 | + | -0.43 | -1.20 | - | -0.76 |
| 12 | 3.4 | +0.55 | + | -0.43 | -0.22 | + | -0.76 |
| 13 | 3.5 | +0.23 | - | +1.44 | -0.64 | +/- | -0.62 |
| 14 | 3.7 | +0.41 | - | +0.85 | +0.50 | + | -1.32 |
| 15 | 4.2 | +2.17 | + | +1.35 | +0.63 | + | +0.27 |
| 16 | 4.5 | +0.11 | - | +0.51 | +3.26 | + | -0.27 |
